# Supplementary material
Source: MDPI journal article supplement (https://www.mdpi.com/2076-3417/12/9/4620)
Supplement: s1 [file s1]

Supplementary Information for

## **Nuclear Magnetic Resonance Spectroscopy Analysis of Anaerobic Microbial Metabolic Response to Benzalkonium Chloride Disinfectant**

**Ryan Freemantle <sup>1</sup>, Nick Butson <sup>2</sup>, Janet Goodfellow<sup>3</sup>, Julie Konzuk<sup>4</sup>, and James G. Longstaffe <sup>1,\*</sup>**

<sup>1</sup> University of Guelph, Guelph, Ontario, N1G 2W1, Canada; rfreem02@uoguelph.ca

<sup>2</sup> Geosyntec Consultants, Waterloo, Ontario, N2L 6R5, Canada; nbutson@geosyntec.com

<sup>3</sup> Geosyntec Consultants, Guelph, Ontario, N1G 3Z2, Canada; jgoodfellow@geosyntec.com

<sup>4</sup> Geosyntec Consultants, Toronto, Ontario, M8X 2X9, Canada; jkonzuk@geosyntec.com

\* Correspondence: jlongsta@uoguelph.ca;

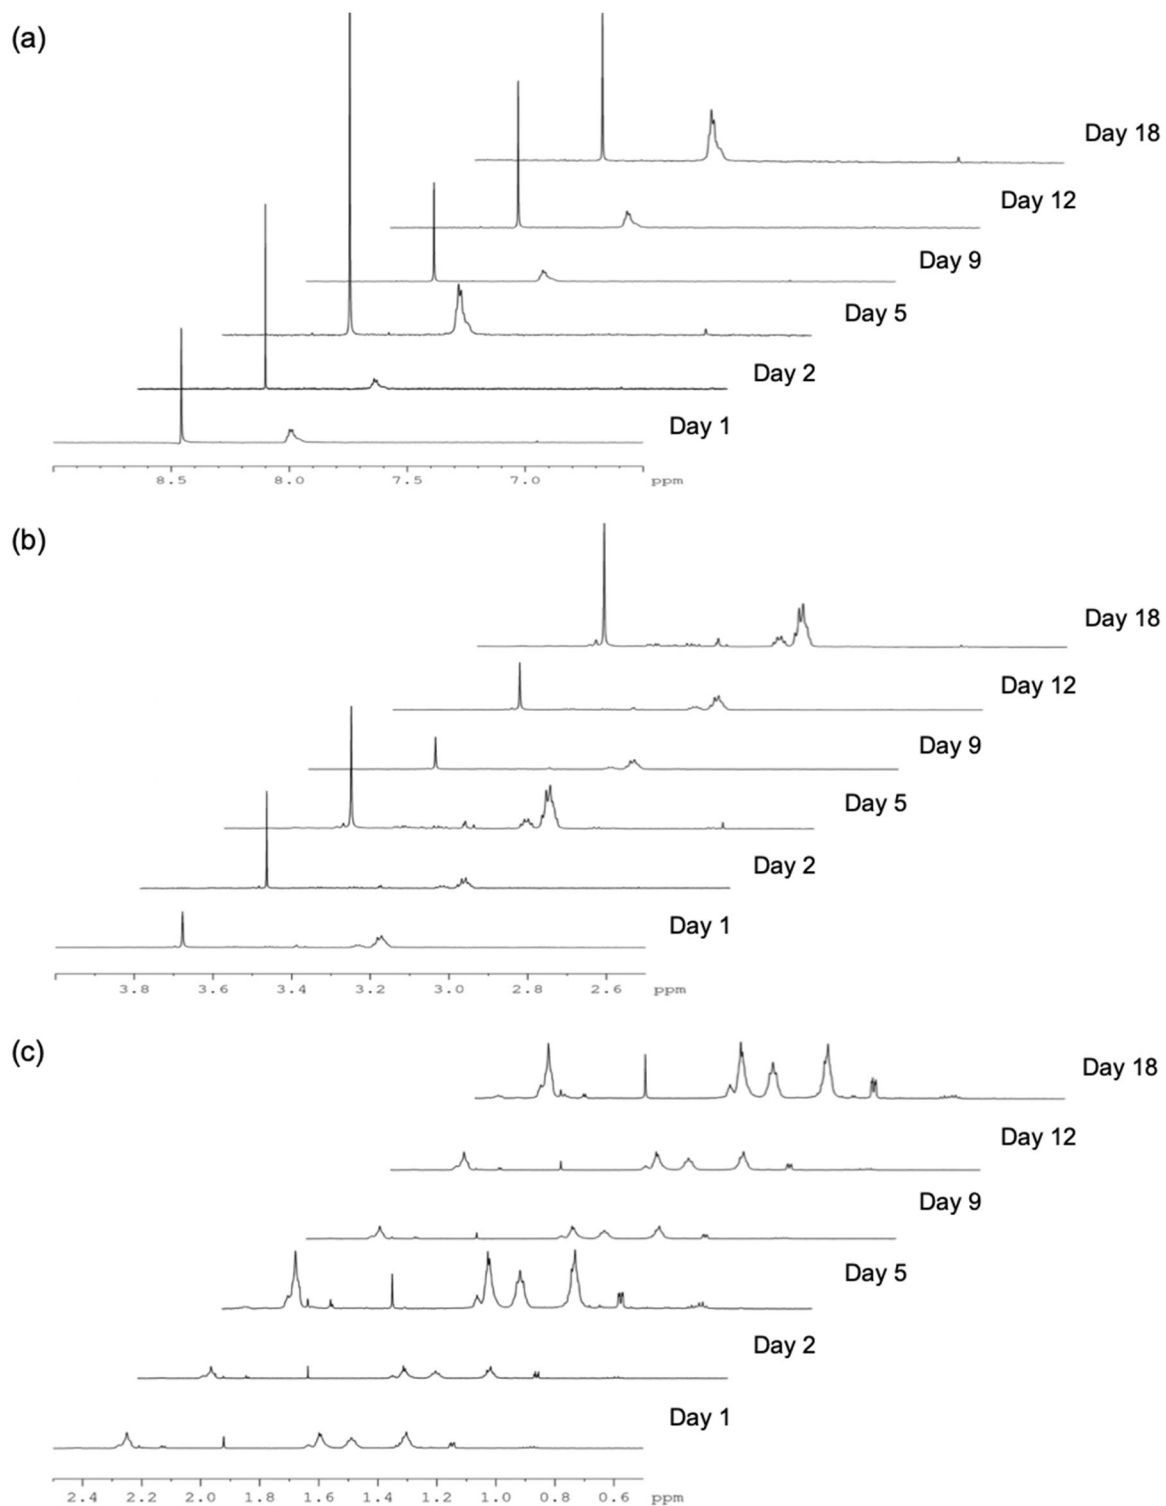

**Figure S1:  $^1\text{H}$  NMR spectra of the 0 mg/L BAC series day 1, 2, 5, 9, 12, and 18. (a) Aromatic Region. (b) Functionalized Alkyl Region. (c) Alkyl Region.**

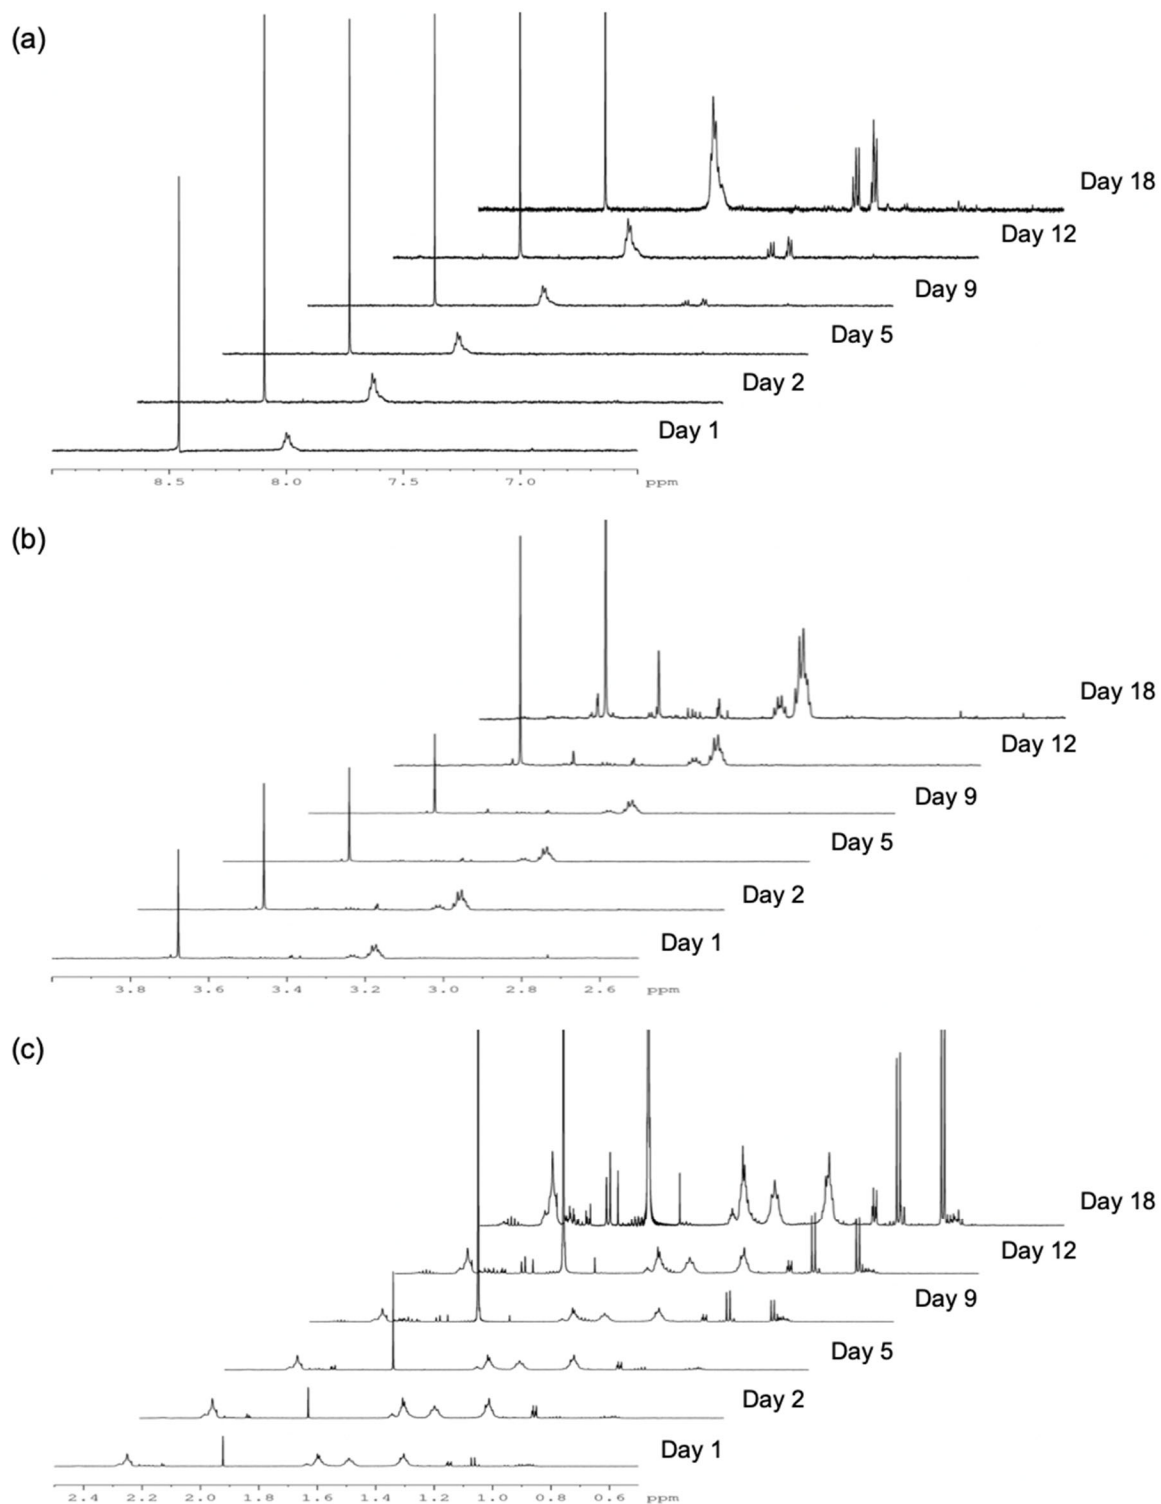

**Figure S2:  $^1\text{H}$  NMR spectra of 16.7 mg/L BAC series day 1, 2, 5, 9, 12, and 18. (a) Aromatic Region. (b) Functionalized Alkyl Region. (c) Alkyl Region.**

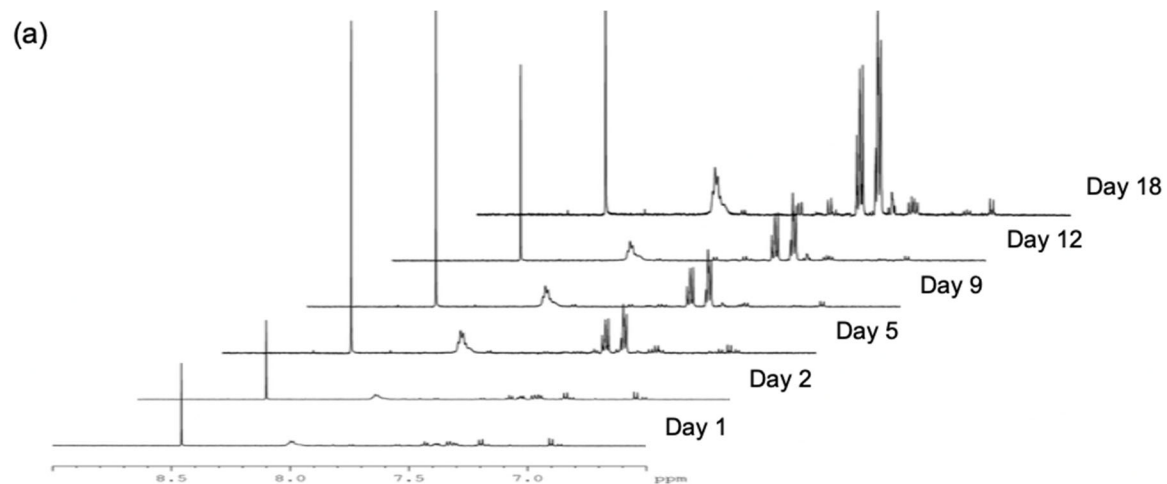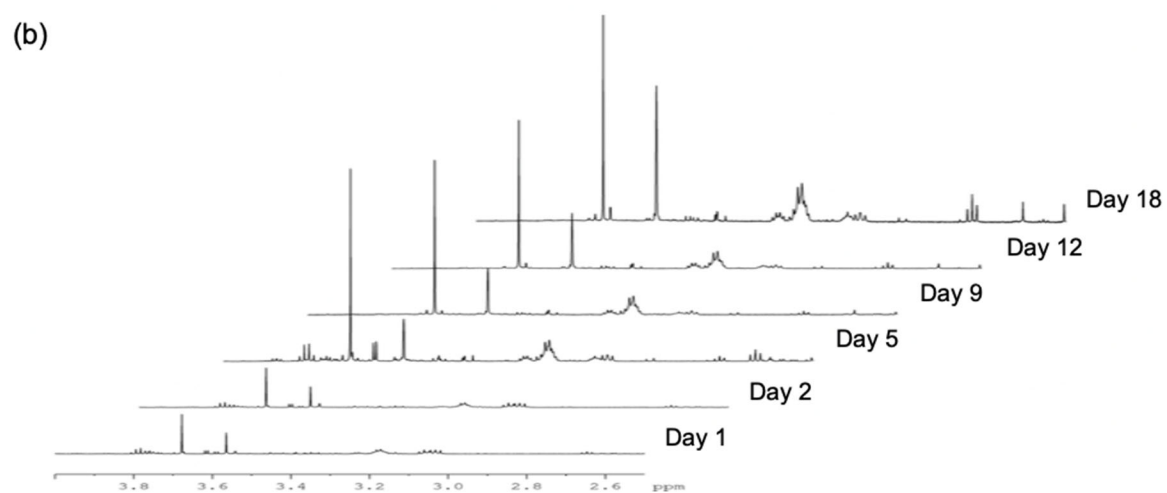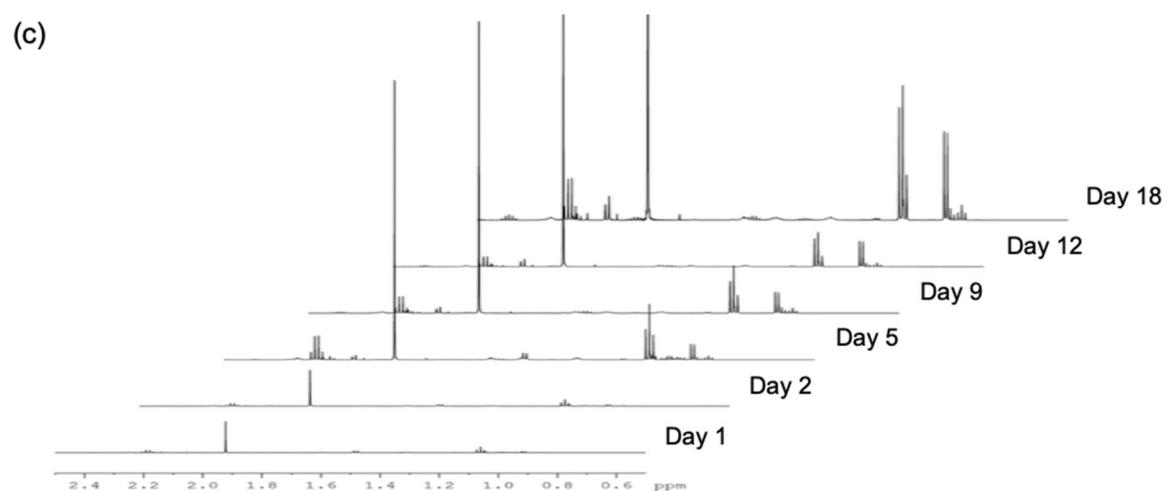

**Figure S3:  $^1\text{H}$  NMR spectra of 33.3 mg/L BAC series day 1, 2, 5, 9, 12, and 18. (a) Aromatic Region. (b) Functionalized Alkyl Region. (c) Alkyl Region.**

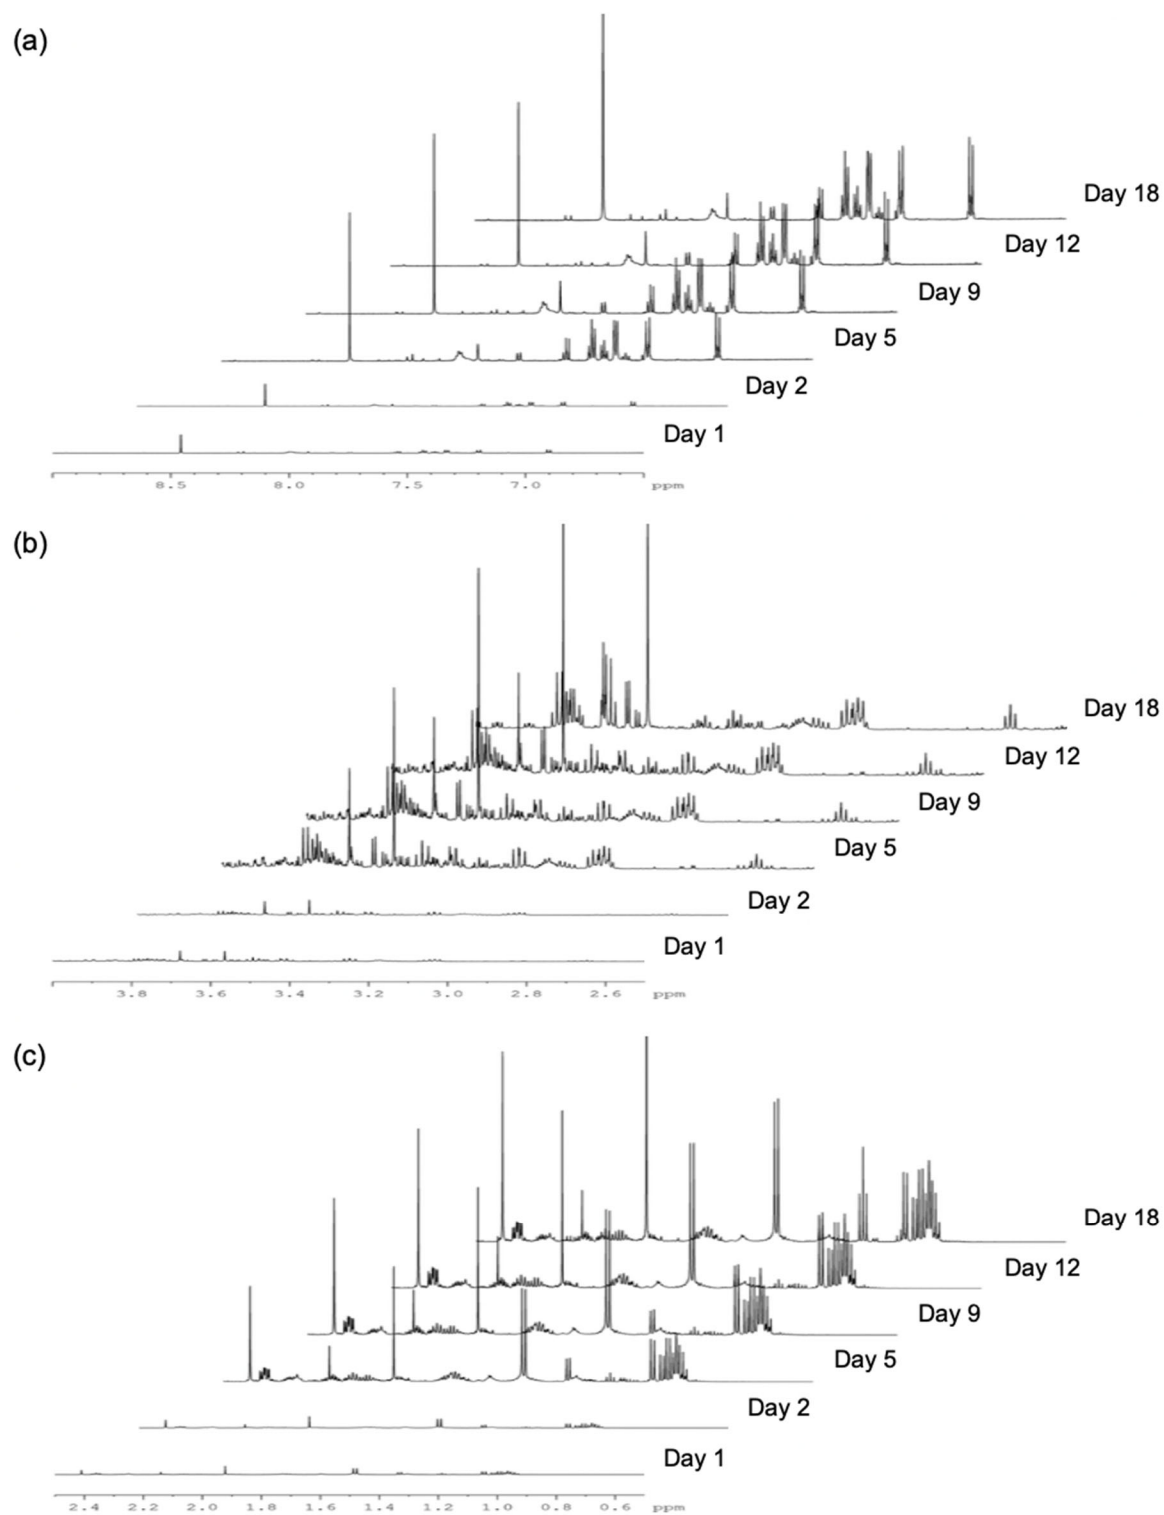

**Figure S4:  $^1\text{H}$  NMR spectra of 66.7 mg/L added BAC series day 1, 2, 5, 9, 12, and 18. (a) Aromatic Region. (b) Functionalized Alkyl Region. (c) Alkyl Region.**

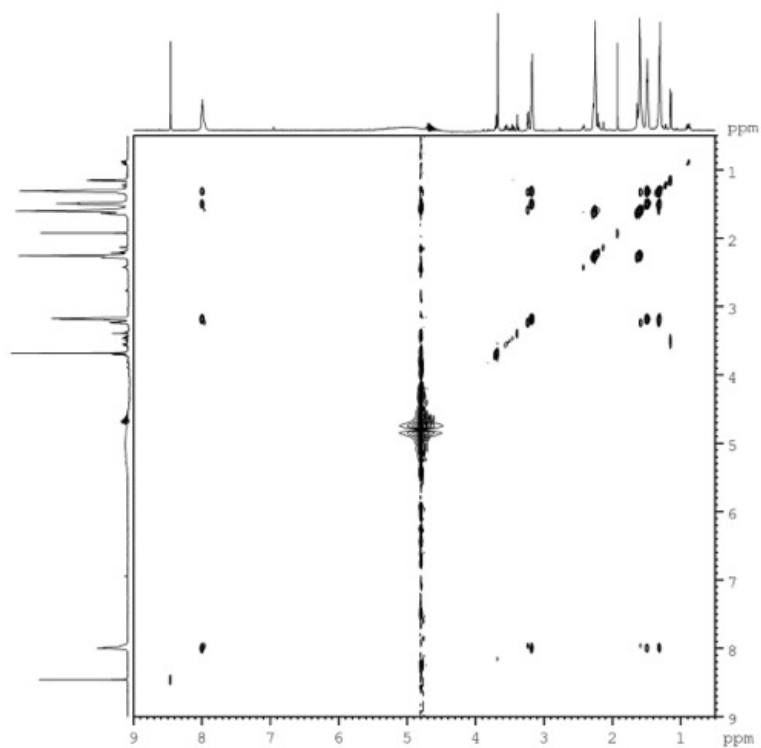

**Figure S5:  $^1\text{H}$  -  $^1\text{H}$  TOCSY NMR spectra of control day 18.**

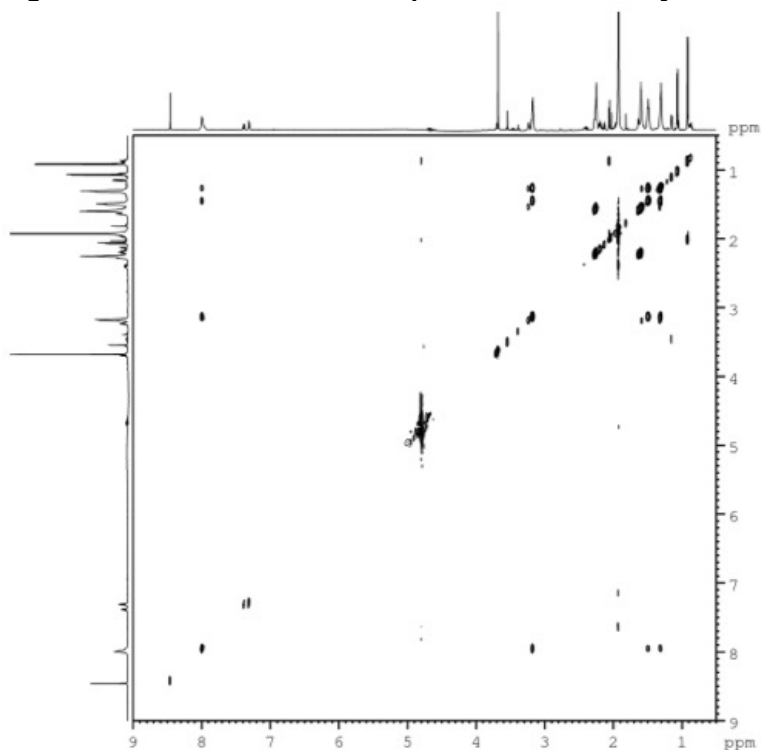

**Figure S6:  $^1\text{H}$  -  $^1\text{H}$  TOCSY NMR spectra of 16.7 mg/L added BAC day 18.**

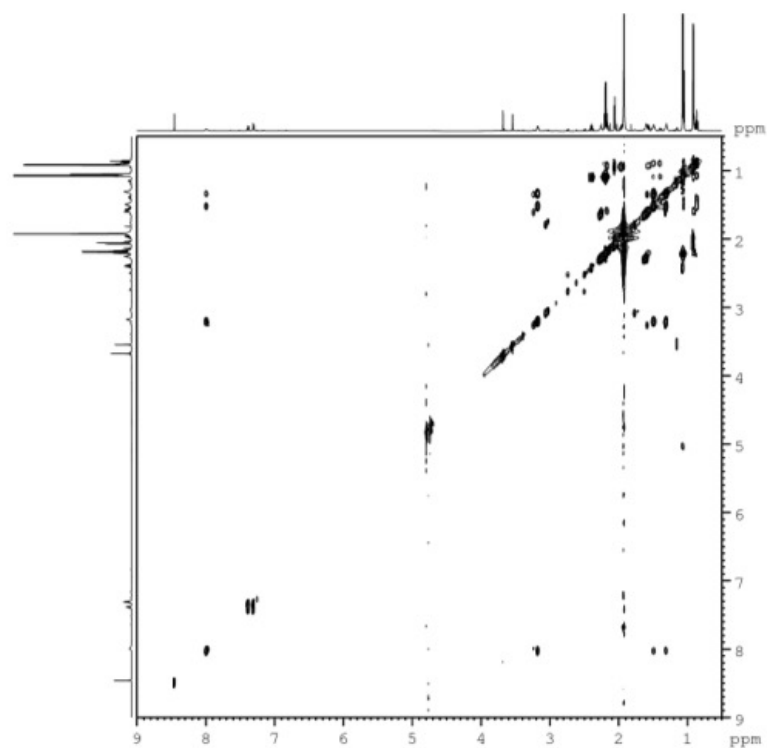

Figure S7: <sup>1</sup>H - <sup>1</sup>H TOCSY NMR spectra of 33.3 mg/L added BAC day 18.

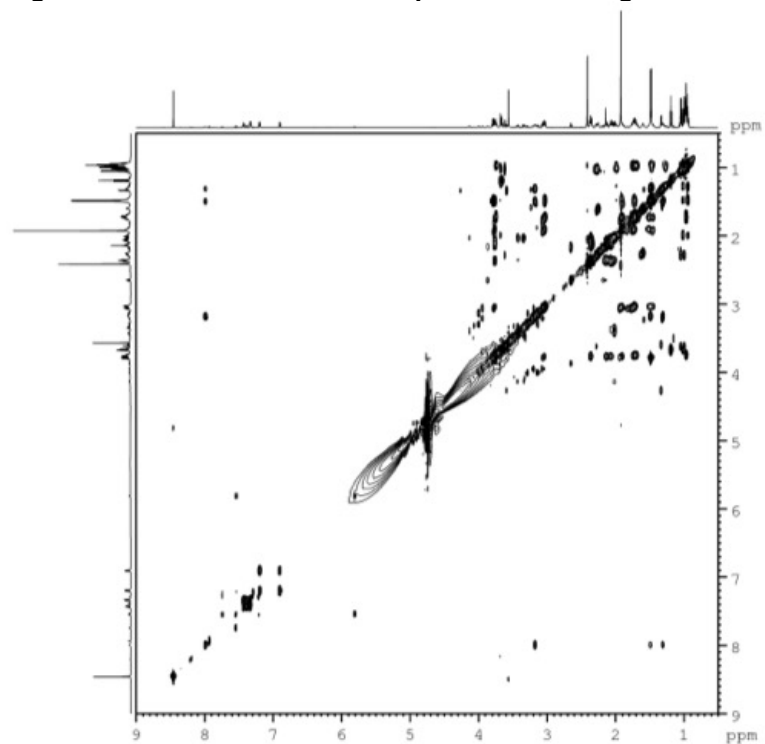

Figure S8: <sup>1</sup>H - <sup>1</sup>H TOCSY NMR spectra of 66.7 mg/L added BAC day 18.

**Table S1: Biogas composition (CO<sub>2</sub> / CH<sub>4</sub>) of control, 16.7 mg/L added BAC, 33.3 mg/L added BAC, and 66.7 mg/L added BAC series.**

| <b>Series</b> | <b>Day 1</b> | <b>Day 2</b> | <b>Day 5</b> | <b>Day 9</b> | <b>Day 12</b> | <b>Day 18</b> |
|---------------|--------------|--------------|--------------|--------------|---------------|---------------|
| Control       | N/A          | 38/62        | 32/68        | 32/68        | 33/67         | 31/69         |
| 16.7 mg/L     | N/A          | 36/64        | 28/72        | 30/70        | 29/71         | 31/69         |
| 33.3 mg/L     | N/A          | 63/37        | 54/46        | 50/50        | 52/48         | 54/46         |
| 66.7 mg/L     | N/A          | 71/29        | 68/32        | 69/31        | 72/28         | 76/24         |
